# Supplementary material
Source: publisher site journal article supplement (https://www.dovepress.com/article/552024)
Supplement: Supplementary file 1 [file 552024_Supplementary_Table_1.docx]

Supplementary Table 1. Clinicopathological characteristics of 203 patients with and without EMM

| Characteristic | | Total (*n* = 203) | EMM− (*n* = 153) | EMM+ (*n* = 50) | *P*-value |
| --- | --- | --- | --- | --- | --- |
| CD20 | + | 24 (11.8) | 23 (15.0) | 1 (2.0) | 0.013* |
| − | 179 (88.2) | 130 (85.0) | 49 (98.0) |
| β2-MG | <5.5 mmol/L | 105 (51.7) | 90 (58.8) | 15 (30.0) | <0.001* |
| >5.5 mmol/L | 98 (48.3) | 63 (41.2) | 35 (70.0) |
| Calcium | >2.65 mmol/L | 31 (15.3) | 19 (12.4) | 12 (24.0) | 0.049* |
| <2.65 mmol/L | 172 (84.7) | 134 (87.6) | 38 (76.0) |
| Sex | Male | 117 (57.6) | 89 (58.2) | 28 (56.0) | 0.788 |
| Female | 86 (42.4) | 64 (41.8) | 22 (44.0) |
| Age | > 60 | 123 (60.6) | 92 (60.1) | 31(62.0) | 0.815 |
| < 60 | 80 (39.4) | 61 (39.9) | 19 (38.0) |
| Plasma cell morphology | Mature type | 85 (41.9) | 69 (45.1) | 16 (32.0) | 0.144 |
| Immature type | 86 (42.4) | 61 (39.9) | 25 (50.0) |
| Pleomorphic type | 3（1.5） | 2 (1.3) | 1 (2.0) |
| Plasmablastic type | 29 (14.3) | 21 (13.7) | 8 (16.0) |
| Pattern of infiltration | Interstitial | 21 (10.3) | 18 (11.8) | 3 (6.0) | 0.397 |
| Nodular | 64 (31.5) | 48 (31.4) | 16 (32.0) |
| Diffuse | 118 (58.1) | 87 (56.9) | 31 (62.0) |
| Plasma cell burden | Mild increase (< 20%) | 19 (9.4) | 10 (6.5) | 9 (18.0) | 0.141 |
| Moderate increase （20–50%） | 37 (18.2) | 29 (19.0) | 8 (16.0) |
| Significant increase（> 50%） | 147 (72.4) | 114 (74.5) | 33 (66.0) |
| Proportion of tumor cells in BM smear | ≤ 10% | 8 (4.0) | 5 (3.4) | 3 (6.0) | 0.417 |
| > 10% | 190 (96.0) | 143 (96.6) | 47 (94.0) |
| M protein type | IgA type | 39 (19.2) | 31 (20.3) | 8 (16.0) | 0.979 |
| IgD type | 12 (5.9) | 11 (7.2) | 1 (2.0) |
| IgG type | 94 (46.3) | 64 (41.8) | 30 (60.0) |
| Non-secretory type | 2 (1) | 2 (1.3) | 0 (0) |
| Light chain type | 56 (27.6) | 45 (29.4) | 11 (22.0) |
| Light chain type | Kappa | 111(54.7) | 83 (54.2) | 28 (56.0) | 0.776 |
| Lambda | 90 (44.3) | 68 (44.4) | 22 (44.0) |
| Non-secretory | 2 (1) | 2 (1.3) | 0 (0) |
| D–S stage | Ⅰ+Ⅱ | 28 (13.7) | 23 (15.0) | 5 (10.0) | 0.370 |
| Ⅲ | 175 (86.2) | 130 (85.0) | 45 (90) |
| ISS stage | Ⅰ+Ⅱ | 77 (37.9) | 52 (34.0) | 25 (50.0) | 0.040* |
| Ⅲ | 126 (62.1) | 101 (66.0) | 25 (50.0) |
| Cyclin D1 | + | 47 (23.2) | 36 (23.5) | 11 (22.0) | 0.824 |
| – | 156 (76.8) | 117 (76.5) | 39 (78.0) |
| CD56 | + | 94 (46.3) | 66 (43.1) | 28 (56.0) | 0.114 |
| – | 109 (53.7) | 87 (56.9) | 22 (44.0) |
| MF | ≥ 2 | 120 (59.1) | 93 (60.8) | 27 (54.0) | 0.398 |
| <2 | 83 (40.9) | 60 (39.2) | 23 (46.0) |
| Creatinine | >177 | 44 (21.7) | 34 (22.2) | 10 (20.0) | 0.741 |
| <177 | 159 (78.3) | 119 (77.8) | 40 (80.0) |
| Albumin | >35 g/L | 118 (58.1) | 89 (58.2) | 29 (58.0) | 0.983 |
| <35 g/L | 85(41.9) | 64 (41.8) | 21 (42.0) |
| Amyloidosis | With | 15 (7.4) | 11 (7.2) | 4 (8.0) | 0.850 |
| Without | 188 (92.6) | 142 (92.8) | 46 (92.0) |
| Plasma cell leukemia | With | 13 (6.4) | 10 (6.5) | 3 (6.0) | 0.893 |
| Without | 190 (93.6) | 143 (93.5) | 47 (94.0) |

**Abbreviations:** EMM, extramedullary multiple myeloma; β2-MG, β2 microglobulin; BM, bone marrow; Ig: immunoglobulin; D-S, Durie–Salmon; ISS, international staging system; MF, myelofibrosis;

**P* < 0.05

Supplementary Table 2. Results of iFISH in 163 patients with MM

|  |  | **Total**  **(n = 163)** | **EMM−**  **(n = 119)** | **EMM+**  **(n = 44)** | ***P*-value** | **EMM+**  **(n = 44)** | **PEMM**  **(n = 30)** | **R/REMM**  **( = 14)** | ***P* value** |
| --- | --- | --- | --- | --- | --- | --- | --- | --- | --- |
| High cytogenetic risk | − | 59 (36.2) | 41 (34.5) | 18 (40.9) | 0.446 | 18 (40.9) | 12 (40.0) | 6 (42.9) | 0.859 |
| + | 104 (63.8) | 78 (65.5) | 26 (59.1) | 26 (59.1) | 18 (60.0) | 8 (57.1) |
| IgH/FGFR3 | − | 97 (59.5) | 70 (58.8) | 27 (61.4) | 0.770 | 27 (61.4) | 17 (56.7) | 10 (71.4) | 0.354 |
| + | 66 (40.5) | 49 (41.2) | 17 (38.6) | 17 (38.6) | 13 (43.3) | 4 (28.6) |
| IgH/MAF | − | 111 (68.1) | 80 (67.2) | 31 (70.5) | 0.696 | 31 (70.5) | 21 (70.0) | 10 (71.4) | 0.924 |
| + | 52 (31.9) | 39 (32.8) | 13 (29.5) | 13 (29.5) | 9 (30.0) | 4 (28.6) |
| TP53 | − | 129 (79.1) | 94 (79.0) | 35 (79.5) | 0.939 | 35 (79.5) | 24 (80.0) | 11 (78.6) | 0.914 |
| + | 34 (20.9) | 25 (21.0) | 9 (20.5) | 9 (20.5) | 6 (20.0) | 3 (21.4) |
| IgH/CCND1 | − | 93 (57.1) | 64 (53.8) | 29 (65.9) | 0.166 | 22 (50.0) | 17 (56.7) | 5 (35.7) | 0.878 |
| + | 70 (42.9) | 55 (46.2) | 15 (34.1) | 22 (50.0) | 13 (43.3) | 9 (64.3) |
| 1q21 | − | 63 (38.7) | 41 (34.5) | 22 (50) | 0.071 | 29 (65.9) | 20 (66.7) | 9 (64.3) | 0.201 |
| + | 100 (61.3) | 78 (65.5) | 22 (50) | 15 (34.1) | 10 (33.3) | 5(35.7) |

Abbreviations: EMM, extramedullary multiple myeloma; PEMM, primary EMM; R/REMM, relapsed or refractory EMM; Ig, immunoglobulin

Supplementary Table 3. Clinicopathological characteristics of 50 patients with EMM

| **Characteristic** |  | **Total(50)** | **P-EMM（n=33）** | **R/R-EMM（n=17）** | **p value** |
| --- | --- | --- | --- | --- | --- |
| Sex | Male | 28(56.0) | 17(51.5) | 11(64.7) | 0.378 |
| Female | 22(44.0) | 16(48.5) | 6(35.3) |
| Age | ＞60 | 31(62.0) | 21(63.6) | 10(58.8) | 0.742 |
| ＜60 | 19(38.0) | 12(36.4) | 7(41.2) |
| Plasma cell morphology | Mature type | 16(32.0) | 12(36.4) | 4(23.5) | 0.336 |
| Immature type | 25(50.0) | 16(48.5) | 9(52.9) |
| pleomorphic type | 1(2.0) | 0(0.0) | 1(5.9) |
| Plasmablastic type | 8(16.0) | 5(15.2) | 3(17.6) |
| Pattern of infiltration | Interstitial | 3(6.0) | 3(9.1) | 0(0.0) | 0.291 |
| Nodular | 16(32.0) | 11(33.3) | 5(29.4) |
| Diffuse | 31(62.0) | 19(57.6) | 12(70.6) |
| Plasma cell burden | Mild increase(＜20%) | 9(18.0) | 6(18.2) | 3(17.6) | 0.922 |
| Moderate increase（20-50%） | 8(16.0) | 5(15.2) | 3(17.6) |
| Significant increase（＞50%） | 33(66.0) | 22(66.7) | 11(64.7) |
| Proportion of tumor cells in BM smear | ≤10% | 3(6.0) | 3(9.1) | 0(0.0) | 0.204 |
| >10% | 47(94.0) | 30(90.9) | 17(100.0) |
| M protein type | IgA type | 8(16.0) | 7(21.2) | 1(5.9) | 0.567 |
| IgD type | 1(2.0) | 1(3.0) | 0(0.0) |
| IgG type | 30(60.0) | 17(51.5) | 13(76.5) |
| Non-secretory type | 0(0) | 0(0.0) | 0(0.0) |
| Light chain type | 11(22.0) | 8(24.2) | 3(17.6) |
| Light chain type | Kappa | 28(56.0) | 18(54.5) | 10(58.8) | 0.775 |
| Lambda | 22(54.0) | 15(45.5) | 7(41.2) |
| Non-secretory | 0(0.0) | 0(0.0) | 0(0.0) |
| D-S stage | Ⅰ+Ⅱ | 5(10.0) | 4(12.1) | 1(5.9) | 0.842 |
| Ⅲ | 45(90.0) | 29(87.9) | 16(47.1) |
| ISS stage | Ⅰ+Ⅱ | 25(50.0) | 17(51.5) | 8(5.9) | 0.326 |
| Ⅲ | 25(50.0) | 16(48.5) | 9(52.9) |
| CD38 | + | 49(98.0) | 33(100.0) | 16(94.1) | 0.164 |
| - | 1(2.0) | 0(0) | 1(5.9) |
| CD138 | + | 50(100.0) | 33(100.0) | 17(100.0) | 1.000 |
| - | 0(0.0) | 0(0) | 0(0.0) |
| MUM-1 | + | 48(96.0) | 31(93.9) | 17(100.0) | 0.305 |
| - | 2(4.0) | 2(6.1) | 0(0) |
| CD20 | + | 1(2.0) | 0(0) | 1(5.9) | 0.164 |
| - | 49(98.0) | 33(100.0) | 16(94.1) |
| CyclinD1 | + | 11(22.0) | 7(21.2) | 4(23.5) | 0.853 |
| - | 39(78.0) | 26(78.8) | 13(76.5) |
| CD56 | + | 28(56.0) | 20(60.6) | 8(47.1) | 0.365 |
| - | 22(44.0) | 13(39.4) | 9(52.9) |
| MF | ≥2 | 27(54.0) | 15(45.5) | 12(70.6) | 0.094 |
| ＜2 | 23(46.0) | 18(54.5) | 5(29.4) |
| β2-MG | ＜5.5mmol/L | 15(30.0) | 7(21.2) | 8(47.1) | 0.061 |
| ＞5.5mmol/L | 35(70.0) | 26(78.8) | 9(52.9) |
| calcium | ＞2.65mmol/L | 12(24.0) | 8(24.2) | 4(23.5) | 0.956 |
| ＜2.65mmol/L | 38(76.0) | 25(75.8) | 13(76.5) |
| creatinine | ＞177μmol/L | 10(20.0) | 4(12.1) | 6(34.3) | 0.055 |
| ＜177μmol/L | 40(80.0) | 29(87.9) | 11(64.7) |
| albumin | ＞35g/L | 29(58.0) | 23(69.7) | 6(35.3) | 0.021* |
| ＜35g/L | 21(42.0) | 10(30.3) | 11(64.7) |
| amyloidosis | With | 4(8.0) | 3(9.1) | 1(5.9) | 0.695 |
| Without | 46(92.0) | 30(90.9) | 16(94.1) |
| Plasma cell leukemia | With | 3(6.0) | 0(0.0) | 3(17.6) | 0.014* |
| Without | 47(94.0) | 33(100.0) | 14(82.4) |

**Abbreviations:** EMM, extramedullary multiple myeloma; PEMM, primary EMM; R/REMM, relapsed or refractory EMM; BM, bone marrow; Ig, immunoglobulin; D–S, Durie–Salmon; ISS, international staging system; MF, myelofibrosis; β2-MG, β2 microglobulin;

* *P* < 0.05
